# Supplementary material for: Genetic Diversity and Virulence Profile of Methicillin and Inducible Clindamycin-Resistant Staphylococcus aureus Isolates in Western Algeria
Source: MDPI journal article supplement (doi:10.3390/antibiotics11070971), 2022-07-19
Supplement: s1 [file s1]

**Supplementary Table S1.** Detail of the distribution of environmental samples according to the isolation site and the presence of *S. aureus*, MSSA and MRSA.

|                      | Isolation site              | Number of samples | <i>S. aureus</i> | MSSA | MRSA |
|----------------------|-----------------------------|-------------------|------------------|------|------|
| Surface areas        | Wet surfaces                | 32                | 8                | 7    | 1    |
|                      | Patient's Beds              | 30                | 6                | 5    | 1    |
|                      | Serum racks                 | 20                | 5                | 4    | 1    |
|                      | Surgical carts              | 30                | 5                | 5    | 0    |
|                      | Door handles                | 30                | 4                | 4    | 0    |
|                      | Waiting room benches        | 42                | 4                | 3    | 1    |
|                      | Floor ICU                   | 13                | 1                | 1    | 0    |
|                      | Switches                    | 20                | 1                | 1    | 0    |
|                      | Trash can lid               | 30                | 1                | 1    | 0    |
|                      | Surgical cart tray          | 10                | 6                | 6    | 0    |
|                      | Surgical scissors and clips | 13                | 1                | 1    | 0    |
|                      | Doctor's office             | 5                 | 0                | 0    | 0    |
|                      | Surgical tables             | 11                | 0                | 0    | 0    |
| Biomedical equipment | Respirators ICU             | 13                | 2                | 1    | 1    |
|                      | Laryngoscope                | 30                | 2                | 2    | 0    |
|                      | Redon drains                | 30                | 2                | 2    | 0    |
|                      | Urinary catheter bags       | 20                | 2                | 2    | 0    |
|                      | Block scope                 | 16                | 1                | 1    | 0    |
|                      | ICU scope                   | 5                 | 0                | 0    | 0    |
| Total                |                             | 400               | 51               | 46   | 5    |

ICU: Intensive Care Unit.

**Supplementary Table S2.** Details of healthcare worker sample distribution according to their role and the presence of *S. aureus*, MSSA and MRSA.

| Function           | Date of collection | Number of samples | <i>S. aureus</i> | MSSA      | MRSA     |
|--------------------|--------------------|-------------------|------------------|-----------|----------|
| General surgeon    | 14.03.21           | 7                 | 3                | 2         | 1        |
| Orthopedic surgeon |                    | 5                 | 0                | 0         | 0        |
| Chief of the block |                    | 1                 | 1                | 1         | 0        |
| Anesthetist        |                    | 3                 | 1                | 1         | 0        |
| Nurse              |                    | 13                | 4                | 3         | 1        |
| Caregiver          |                    | 8                 | 3                | 3         | 0        |
| Coordinator        |                    | 1                 | 0                | 0         | 0        |
| Cleaning agent     |                    | 2                 | 0                | 0         | 0        |
| <b>Total</b>       |                    | <b>40</b>         | <b>12</b>        | <b>10</b> | <b>2</b> |

**Supplementary Table S3.** Details of patient sample distribution according to age and gender of patients and by the department in which they were hospitalised and the presence of *S. aureus*, MSSA and MRSA.

| Date of collection | Total of samples | Gender |   | Age        |             |             |             | Number of samples |   | <i>S. aureus</i> |   | MSSA |   | MRSA |   |
|--------------------|------------------|--------|---|------------|-------------|-------------|-------------|-------------------|---|------------------|---|------|---|------|---|
|                    |                  | M      | F | 0-14 years | 15-24 years | 25-64 years | 65 and more | G                 | O | G                | O | G    | O | G    | O |
| 08.11.20           | 3                | 1      | 2 | 0          | 0           | 2           | 1           | 3                 | 0 | 1                | 0 | 1    | 0 | 0    | 0 |
| 10.11.20           | 6                | 1      | 5 | 0          | 2           | 4           | 0           | 4                 | 2 | 2                | 0 | 2    | 0 | 0    | 0 |
| 15.11.20           | 2                | 0      | 2 | 0          | 0           | 2           | 0           | 2                 | 0 | 0                | 0 | 0    | 0 | 0    | 0 |
| 18.11.20           | 5                | 2      | 3 | 1          | 0           | 3           | 1           | 3                 | 2 | 2                | 0 | 2    | 0 | 0    | 0 |
| 25.11.20           | 10               | 8      | 2 | 0          | 3           | 5           | 2           | 7                 | 3 | 1                | 1 | 1    | 1 | 0    | 0 |
| 02.12.20           | 13               | 6      | 7 | 0          | 1           | 8           | 4           | 8                 | 5 | 3                | 2 | 3    | 2 | 0    | 0 |
| 06.12.20           | 5                | 3      | 2 | 0          | 0           | 4           | 1           | 5                 | 0 | 2                | 0 | 1    | 0 | 1    | 0 |
| 09.12.20           | 10               | 4      | 6 | 0          | 1           | 6           | 3           | 3                 | 7 | 1                | 4 | 1    | 4 | 0    | 0 |

|                 |            |           |           |          |           |           |           |           |           |           |           |           |           |          |          |
|-----------------|------------|-----------|-----------|----------|-----------|-----------|-----------|-----------|-----------|-----------|-----------|-----------|-----------|----------|----------|
| <b>10.01.21</b> | 9          | 2         | 7         | 0        | 3         | 5         | 1         | 8         | 1         | 2         | 1         | 2         | 1         | 0        | 0        |
| <b>13.01.21</b> | 8          | 3         | 5         | 0        | 1         | 7         | 0         | 5         | 3         | 0         | 0         | 0         | 0         | 0        | 0        |
| <b>24.01.21</b> | 10         | 8         | 2         | 2        | 0         | 8         | 0         | 8         | 2         | 2         | 0         | 1         | 0         | 1        | 0        |
| <b>27.01.21</b> | 9          | 5         | 4         | 0        | 1         | 6         | 2         | 5         | 4         | 1         | 0         | 1         | 0         | 0        | 0        |
| <b>31.01.21</b> | 8          | 6         | 2         | 0        | 2         | 5         | 1         | 6         | 2         | 0         | 1         | 0         | 1         | 0        | 0        |
| <b>23.03.21</b> | 5          | 3         | 2         | 0        | 0         | 5         | 0         | 3         | 2         | 0         | 2         | 0         | 2         | 0        | 0        |
| <b>28.03.21</b> | 7          | 0         | 7         | 0        | 2         | 3         | 2         | 4         | 3         | 1         | 0         | 0         | 0         | 1        | 0        |
| <b>Total</b>    | <b>110</b> | <b>52</b> | <b>58</b> | <b>3</b> | <b>16</b> | <b>73</b> | <b>18</b> | <b>74</b> | <b>36</b> | <b>18</b> | <b>11</b> | <b>15</b> | <b>11</b> | <b>3</b> | <b>0</b> |

M: Male, F: Female, G: General surgery department, O: Orthopaedic surgery department.
